# Supplementary material for: Dietary phytogenics and galactomannan oligosaccharides in low fish meal and fish oil-based diets for European sea bass (Dicentrarchus labrax) juveniles: Effects on gut health and implications on in vivo gut bacterial translocation
Source: PLoS One. 2019 Sep 18;14(9):e0222063. doi: 10.1371/journal.pone.0222063 (PMC6750610; doi:10.1371/journal.pone.0222063)
Supplement: S2 Fig — (XLSX) [file pone.0222063.s002.xlsx]

## Sheet: S2 FIg
PAPER:	Effects of dietary phytogenics and galactomannan oligosaccharides in low fish meal and fish oil-based diets on gut health and disease resistance in European sea bass (Dicentrarchus labrax)
AUTHORS:	Torrecillas, S., Terova, G., Makol, A., Serradell, A., Valdenegro, V., Gini, E., Izquierdo, MS., Acosta, F., Montero, D.
CRITERIA:	Time course study of European sea bass (Dicentrarchus labrax) posterior and rectum gut fold area percentage covered by goblet cells and goblet cell area (µm2) during the 7 days of the challenge test (V. anguillarum intestinal infection + stress by confinement)
TISSUE:	Posterior gut
(A) Posterior gut fold area percentage covered by goblet cells during the challenge test.														Two-Way ANOVA
	Hours	CONTROL			GMOS			PHYTO			GMOSPHYTO			GMOS	PHYTO	GMOS*PHYTO
	0	10.25	±	0.2	8.84	±	1.53	9.19	±	0.95	8.79	±	2.44	NS	NS	NS
	2	6.71	±	1.5	7.42	±	2.5	8.34	±	1.95	7.21	±	1.34	NS	NS	NS
	24	9.22	±	2.89	9.11	±	1.54	7.12	±	0.86	9.11	±	1.54	NS	NS	NS
	168	9.31	±	4.3	9.71	±	2.35	11.88	±	2.9	8.77	±	2.3	NS	NS	NS
B) Rectum fold area percentage covered by goblet cells during the challenge test.
	Hours	CONTROL			GMOS			PHYTO			GMOSPHYTO			GMOS	PHYTO	GMOS*PHYTO
	0	6.44	±	0.54	5.16	±	0.73	6.53	±	2.14	6.52	±	0.67	NS	NS	NS
	2	4.83	±	0.55	5.29	±	1.75	4.29	±	1.71	5	±	0.57	NS	NS	NS
	24	5.51	±	2.18	6.4	±	1.43	6.65	±	2.19	7.19	±	1.56	NS	NS	NS
	168	1.63	±	0.21	2.4	±	1.62	3.18	±	0.28	5.33	±	1.2	NS	F=12.56; P=0.012	NS
(C)Posterior gut goblet cells area (µm2) during the challenge test.
	Hours	CONTROL			GMOS			PHYTO			GMOSPHYTO			GMOS	PHYTO	GMOS*PHYTO
	0	81.61	±	15.3	61.29	±	10.3	56.19	±	8.2	66.24	±	10.2	NS	F=3.95; P=0.05	F=8.73; P=0.006
	2	61.06	±	14.83	62.93	±	6.01	62.66	±	2.8	69.94	±	13.53	NS	NS	NS
	24	33.56	±	8.23	27.53	±	7.7	46.41	±	17.85	27.53	±	7.7	F=7.67; P=0.013	NS	NS
	168	85.28	±	17.69	70.85	±	10.54	64.93	±	11.9	57.03	±	11.34	F=16.26; P=0.004	F=6.94; P=0.030	NS
(D) Rectum goblet cell area (µm2) during the challenge test.
	Hours	CONTROL			GMOS			PHYTO			GMOSPHYTO			GMOS	PHYTO	GMOS*PHYTO
	0	114.49	±	4.03	85.96	±	20.39	96.31	±	26.69	108.97	±	8.43	NS	NS	F=10.05; P=0.003
	2	100.71	±	6.8	103.55	±	19.03	94.65	±	12.98	101.18	±	37.79	NS	NS	NS
	24	97.65	±	8.89	96.36	±	10.33	98.04	±	15.01	106.11	±	3.64	NS	NS	NS
	168	101.6	±	10.76	108.75	±	22.18	127.83	±	8.37	114.65	±	14.46	NS	NS	NS
Diets: GOS (5000 ppm galactooligosaccharides), PHYTO (200ppm phytogenic), GOSPHYTO (5000 ppm galactooligosaccharides+200ppm
phytogenic). Posterior gut (preileorectal valve segment) and rectum (postileorectal valve segment) as detailed in Figure 1.
Two-way ANOVA analyses (P<0.05). NS= No significant.
